# Supplementary material
Source: PubMed Central journal article supplement (PMC4651745)
Supplement: NIHMS728169-supplement-1.pdf [file NIHMS728169-supplement-1.pdf]

**Supplementary Table 1. Subject characteristics of cases and controls undergoing genetic association analyses from the California Childhood Leukemia Study, The Children’s Oncology Group, The Wellcome Trust Consortium, the GENEVA Melanoma Study, The University of California, San Francisco Adult Glioma Study, The Mayo Clinic glioma study, and the CGEMS PanScan pancreatic cancer case-control study.**

| <b>Population</b>                                    | <b>Phase of Study</b>                   | <b>N (cases/controls)</b> | <b>Ethnicity</b>                    | <b>Tumor subtype of cases</b>          | <b>Genotyping technique</b>       | <b>% Male (cases/controls)</b> |
|------------------------------------------------------|-----------------------------------------|---------------------------|-------------------------------------|----------------------------------------|-----------------------------------|--------------------------------|
| California Childhood Leukemia Study                  | ALL discovery                           | 321/454                   | Hispanic                            | B-cell ALL (92.5%) <sup>1</sup>        | Illumina OmniExpress              | 54% / 53%                      |
| Children's Oncology Group                            | ALL validation set 1                    | 980/0                     | European-ancestry                   | Unknown                                | Affymetrix 6.0                    | 51% / -                        |
| Wellcome Trust Consortium                            | ALL validation set 1                    | 0/2624                    | European-ancestry                   | -                                      | Affymetrix 6.0                    | - / 52%                        |
| California Childhood Leukemia Study                  | ALL validation set 2                    | 163/201                   | African-American (73%) <sup>2</sup> | B-cell ALL (86.5%) <sup>3</sup>        | TaqMan                            | 62% / 62%                      |
| M.D. Anderson GENEVA melanoma study                  | Melanoma case-control analysis          | 1969/1044                 | European-ancestry                   | Invasive melanoma (92.4%) <sup>4</sup> | Illumina Omni1-Quad               | 58% / 59%                      |
| The UCSF Adult Glioma Study                          | Glioblastoma case-control analysis      | 380/547                   | European-ancestry                   | Glioblastoma                           | Pooled next-gen sequencing        | 65% / 53%                      |
| Mayo Clinic glioma case-control study                | Glioblastoma case-control analysis      | 304/274                   | European-ancestry                   | Glioblastoma                           | Pooled next-gen sequencing        | 62% / 66%                      |
| CGEMS PanScan pancreatic cancer case-control samples | Pancreatic cancer case-control analysis | 2273/2418                 | European-ancestry                   | Pancreatic adenocarcinoma (>85%)       | Illumina Human550v3 or 610QuadV1B | 52% / 52%                      |

<sup>1</sup>7.5% of ALL patients in the CCLS discovery set had T-cell ALL.

<sup>2</sup>27% individuals in the CCLS validation sample were Hispanic. Cases and controls were matched on race/ethnicity.

<sup>3</sup>13.5% of ALL patients in the CCLS validation sample had T-cell ALL.

<sup>4</sup>7.1% of patients were diagnosed with melanoma *in-situ* and 0.51% with atypical melanocytic proliferation.
