# Supplementary material
Source: PubMed Central journal article supplement (PMC4651745)
Supplement: NIHMS728169-supplement-2.pdf [file NIHMS728169-supplement-2.pdf]

**Table S2. Top SNP associations in the 9p21.3 region evaluated in Hispanic ALL patients from CCLS and validated in European-ancestry ALL patients from COG, with functional annotation.**

| rsID <sup>1</sup> | Position | MAF <sup>2</sup> | P <sub>Meta</sub> <sup>3</sup> | OR <sub>meta</sub> <sup>3</sup> | P <sub>CCS</sub> <sup>4</sup> | OR <sub>CCS</sub> <sup>4</sup> | P <sub>COG</sub> <sup>5</sup> | OR <sub>COG</sub> <sup>5</sup> | Functional Annotation | RegulomeDB Score <sup>6</sup> | Promoter <sup>7</sup> | Enhancer <sup>7</sup> | DNase Hypersensitivity <sup>7</sup> | Motifs altered <sup>8</sup> | eQTL <sup>9</sup> |
|-------------------|----------|------------------|--------------------------------|---------------------------------|-------------------------------|--------------------------------|-------------------------------|--------------------------------|-----------------------|-------------------------------|-----------------------|-----------------------|-------------------------------------|-----------------------------|-------------------|
| rs3731249         | 21970916 | 0.02             | 2.42E-12                       | 2.92                            | 3.78E-04                      | 2.77                           | 1.51E-09                      | 2.99                           | missense              | 4                             |                       | Yes                   |                                     |                             | NA                |
| rs113650570       | 21976402 | 0.02             | 2.66E-12                       | 2.94                            | 4.22E-04                      | 2.82                           | 1.51E-09                      | 2.99                           | intronic              | 4                             | Yes                   | Yes                   |                                     |                             | NA                |
| rs36228834        | 21975319 | 0.02             | 2.68E-12                       | 2.94                            | 4.25E-04                      | 2.82                           | 1.51E-09                      | 2.99                           | intronic              | 3a                            | Yes                   | Yes                   | Yes                                 | Myb,MYBL                    | NA                |
| rs56018935        | 21966527 | 0.10             | 4.29E-09                       | 1.63                            | 7.08E-04                      | 1.92                           | 1.00E-06                      | 1.57                           | intergenic            | 4                             |                       |                       |                                     |                             | CDKN2B            |
| rs78545330        | 21995941 | 0.09             | 3.05E-08                       | 1.59                            | 5.27E-04                      | 1.93                           | 7.92E-06                      | 1.52                           | intronic              | 2b                            | Yes                   | Yes                   | Yes                                 | REST                        | NA                |
| rs3218018         | 21998139 | 0.08             | 3.83E-08                       | 1.61                            | 3.25E-04                      | 2.10                           | 1.10E-05                      | 1.52                           | intronic              | 5                             |                       | Yes                   |                                     |                             | CDKN2B            |
| rs2069426         | 22006273 | 0.08             | 4.23E-08                       | 1.60                            | 3.23E-04                      | 2.10                           | 1.19E-05                      | 1.51                           | intronic              | 2b                            |                       | Yes                   | Yes                                 | REST,Ascl2                  | CDKN2B            |
| rs77920300        | 22012441 | 0.08             | 4.76E-08                       | 1.60                            | 3.15E-04                      | 2.10                           | 1.33E-05                      | 1.51                           | intronic              | NA                            |                       |                       |                                     |                             | NA                |
| rs3218007         | 21999800 | 0.09             | 5.28E-08                       | 1.56                            | 6.88E-04                      | 1.88                           | 1.12E-05                      | 1.50                           | intronic              | NA                            |                       | Yes                   |                                     |                             | CDKN2B            |
| rs2069422         | 22008026 | 0.09             | 5.33E-08                       | 0.63                            | 4.58E-04                      | 0.50                           | 1.22E-05                      | 0.67                           | intronic              | 5                             |                       | Yes                   |                                     | CEBPA                       | CDKN2B            |
| rs3218002         | 22000841 | 0.09             | 5.34E-08                       | 1.56                            | 6.86E-04                      | 1.88                           | 1.13E-05                      | 1.50                           | intronic              | 5                             | Yes                   |                       |                                     | Sox                         | CDKN2B            |
| rs3218005         | 22000247 | 0.09             | 5.61E-08                       | 1.56                            | 7.53E-04                      | 1.87                           | 1.12E-05                      | 1.50                           | intronic              | 5                             |                       | Yes                   |                                     |                             | CDKN2B            |
| rs974336          | 22006348 | 0.09             | 6.48E-08                       | 1.56                            | 6.52E-04                      | 1.89                           | 1.38E-05                      | 1.49                           | intronic              | 4                             | Yes                   | Yes                   | Yes                                 |                             | CDKN2B            |
| rs2811712         | 21998035 | 0.10             | 6.59E-08                       | 0.65                            | 1.04E-03                      | 0.55                           | 1.06E-05                      | 0.67                           | intronic              | 6                             |                       | Yes                   |                                     | Dlx3                        | CDKN2B            |
| rs77728904        | 22057530 | 0.07             | 6.76E-08                       | 1.65                            | 1.31E-03                      | 2.01                           | 8.52E-06                      | 1.58                           | intronic              | NA                            |                       |                       |                                     |                             | NA                |
| rs77284052        | 22025885 | 0.09             | 7.28E-08                       | 1.58                            | 2.99E-04                      | 2.11                           | 1.96E-05                      | 1.49                           | intronic              | NA                            |                       |                       |                                     |                             | CDKN2B            |
| rs116729641       | 22025432 | 0.09             | 7.39E-08                       | 1.58                            | 3.00E-04                      | 2.11                           | 1.99E-05                      | 1.49                           | intronic              | 5                             |                       |                       |                                     |                             | CDKN2B            |
| rs79182326        | 22034267 | 0.09             | 7.92E-08                       | 1.58                            | 3.32E-04                      | 2.10                           | 1.98E-05                      | 1.49                           | intronic              | 6                             |                       | Yes                   |                                     | VAX,ELF,PA<br>X4,ARID3A     | CDKN2B            |
| rs79985856        | 22033824 | 0.09             | 8.08E-08                       | 1.58                            | 3.43E-04                      | 2.09                           | 1.98E-05                      | 1.49                           | intronic              | 5                             |                       | Yes                   |                                     |                             | CDKN2B            |
| rs76213463        | 22040839 | 0.09             | 8.58E-08                       | 1.58                            | 3.67E-04                      | 2.08                           | 2.02E-05                      | 1.49                           | intronic              | 4                             |                       | Yes                   |                                     |                             | CDKN2B            |
| rs80166549        | 22041155 | 0.09             | 8.62E-08                       | 1.58                            | 3.69E-04                      | 2.08                           | 2.02E-05                      | 1.49                           | intronic              | 4                             |                       | Yes                   |                                     |                             | CDKN2B            |
| rs72652411        | 22085028 | 0.05             | 9.11E-08                       | 1.87                            | 2.00E-04                      | 2.72                           | 3.48E-05                      | 1.71                           | intronic              | 4                             |                       |                       |                                     |                             |                   |
| rs17694555        | 22051295 | 0.07             | 1.00E-07                       | 1.65                            | 1.45E-04                      | 2.44                           | 3.23E-05                      | 1.53                           | intronic              | 4                             | Yes                   | Yes                   | Yes                                 |                             | CDKN2B            |
| rs3731246         | 21971989 | 0.10             | 1.42E-07                       | 1.55                            | 2.13E-03                      | 1.80                           | 1.30E-05                      | 1.50                           | intronic              | 5                             |                       |                       |                                     |                             | CDKN2B            |
| rs115939893       | 22054821 | 0.08             | 1.46E-07                       | 1.58                            | 1.42E-03                      | 2.04                           | 1.32E-05                      | 1.51                           | intronic              | 6                             |                       |                       |                                     | ER                          | CDKN2B            |
| rs74655961        | 22054164 | 0.08             | 1.75E-07                       | 1.58                            | 1.46E-03                      | 2.04                           | 1.53E-05                      | 1.51                           | intronic              | 5                             |                       |                       |                                     |                             | CDKN2B            |
| rs17694572        | 22054356 | 0.08             | 1.80E-07                       | 1.58                            | 1.45E-03                      | 2.04                           | 1.56E-05                      | 1.51                           | intronic              | 1f                            |                       |                       |                                     |                             | CDKN2B            |
| rs1333035         | 22044059 | 0.10             | 1.87E-07                       | 0.66                            | 3.60E-04                      | 0.52                           | 4.84E-05                      | 0.70                           | intronic              | 4                             |                       | Yes                   |                                     |                             | CDKN2B            |
| rs2427853         | 21950472 | 0.09             | 1.89E-07                       | 0.62                            | 3.25E-03                      | 0.50                           | 1.03E-05                      | 0.65                           | intergenic            | NA                            |                       |                       |                                     |                             | CDKN2B            |
| rs598664          | 22027551 | 0.09             | 2.08E-07                       | 0.65                            | 4.24E-04                      | 0.49                           | 4.11E-05                      | 0.69                           | intronic              | 6                             |                       | Yes                   |                                     | FOXP1                       | CDKN2B            |

|             |          |      |          |      |          |      |          |      |            |    |     |     |     |  |                            |        |
|-------------|----------|------|----------|------|----------|------|----------|------|------------|----|-----|-----|-----|--|----------------------------|--------|
| rs2518716   | 21956470 | 0.09 | 2.29E-07 | 0.62 | 1.78E-03 | 0.48 | 1.70E-05 | 0.65 | intergenic | NA |     |     |     |  |                            | CDKN2B |
| rs2427852   | 21950432 | 0.09 | 2.80E-07 | 0.62 | 3.33E-03 | 0.50 | 1.45E-05 | 0.65 | intergenic | 6  |     |     |     |  | Evi1,LEF1,TCF7,FOXP1,GATA4 | CDKN2B |
| rs17756311  | 22053895 | 0.08 | 3.20E-07 | 1.56 | 1.48E-03 | 2.04 | 2.60E-05 | 1.49 | intronic   | 6  |     | Yes |     |  |                            | NA     |
| rs1333034   | 22044122 | 0.09 | 3.23E-07 | 0.66 | 5.09E-04 | 0.50 | 5.64E-05 | 0.69 | intronic   | 5  |     | Yes |     |  | TCF3                       | CDKN2B |
| rs72654280  | 22121357 | 0.06 | 3.25E-07 | 1.80 | 4.13E-04 | 2.85 | 4.98E-05 | 1.66 | intergenic | NA |     |     |     |  |                            | CDKN2B |
| rs72652409  | 22083994 | 0.05 | 3.57E-07 | 1.83 | 4.80E-04 | 2.63 | 7.04E-05 | 1.69 | intronic   | NA |     |     |     |  |                            | CDKN2B |
| rs2263145   | 21950452 | 0.10 | 3.74E-07 | 0.65 | 1.74E-02 | 0.62 | 6.90E-06 | 0.66 | intergenic | NA |     |     |     |  | AP1,PAX4,PAX5              | CDKN2A |
| rs2811709   | 21980151 | 0.10 | 4.93E-07 | 0.66 | 2.03E-03 | 0.56 | 4.25E-05 | 0.69 | intronic   | 6  |     | Yes |     |  | MEF2                       | NA     |
| rs662463    | 22030438 | 0.09 | 5.25E-07 | 0.66 | 4.93E-04 | 0.50 | 8.56E-05 | 0.70 | intronic   | 1f | Yes | Yes | Yes |  | SkMC                       | CDKN2B |
| rs2518721   | 21979204 | 0.11 | 5.29E-07 | 0.66 | 1.79E-03 | 0.56 | 5.00E-05 | 0.69 | intronic   | 6  |     | Yes |     |  | DMRT2,IRF2,STAT1,ICSBP     | CDKN2B |
| rs572738724 | 22095728 | 0.03 | 1.01E-06 | 2.08 | 2.07E-04 | 3.33 | 3.42E-04 | 1.83 | intronic   | NA | NA  | NA  | NA  |  | NA                         | NA     |
| rs115574830 | 22059061 | 0.09 | 2.08E-06 | 1.51 | 1.23E-03 | 2.01 | 1.71E-04 | 1.43 | intronic   | NA |     |     |     |  |                            | CDKN2B |

<sup>1</sup>42 SNPs having smaller p-values and larger effect sizes than tag SNP rs 3731217 in CCLS discovery analyses, and also associated at  $P < 1.1 \times 10^{-3}$  in COG validation analyses, appear here. <sup>2</sup>MAF calculated in CCLS and WTCCC controls combined; <sup>3</sup>Totaling 1301 cases and 3078 controls; <sup>4</sup>Totaling 321 Hispanic cases and 454 Hispanic controls; <sup>5</sup>Totaling 980 European-ancestry cases and 2624 controls; <sup>6</sup>RegulomeDB scores: 1f eQTL+TF binding/DNase peak; 2b, TF binding+any motif+DNase Footprint+DNase peak; 3a, TF binding+any motif+DNase peak; 4, TF binding+DNase peak; 5, TF binding or DNase peak; 6, other. <sup>7</sup>Promoter Histone Marks, Enhancer Histone Marks and DNase hypersensitivity sites appearing in blood and extracted from ENCODE2 data using HaploRegV3; <sup>8</sup>Altered motifs from footprinting and position-weight matrix analysis, extracted from RegulomeDB; <sup>9</sup>Genotype-Tissue Expression (GTEx) project association p-values  $< 0.05$ , in whole-blood, were taken to indicate a significant eQTL.
